# Supplementary material for: Isolation and Preliminary Characterization of Proteinaceous Toxins with Insecticidal and Antibacterial Activities from Black Widow Spider (L. tredecimguttatus) Eggs
Source: PubMed Central journal article supplement (PMC4379531; doi:10.3390/toxins7030886), 2015-03-16
Supplement: toxins-07-00886-s001.pdf [file toxins-07-00886-s001.pdf]

## Supplementary Information

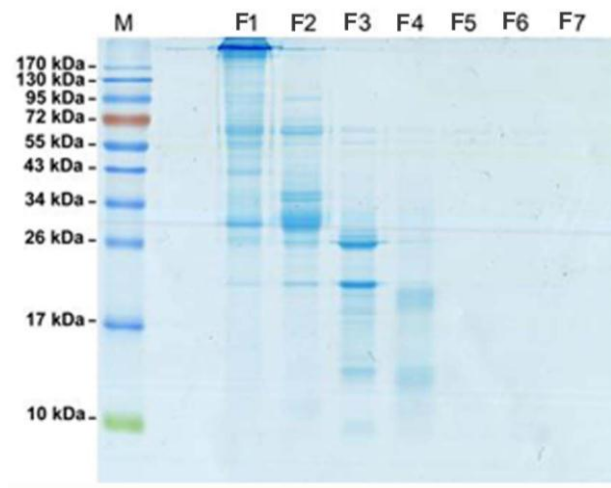

**Figure S1.** SDS-PAGE image of fractions F1–F7 from molecular sieve chromatography of the extract of black widow spider eggs (Adapted from [10] with minor modification). M, molecular mass marker.

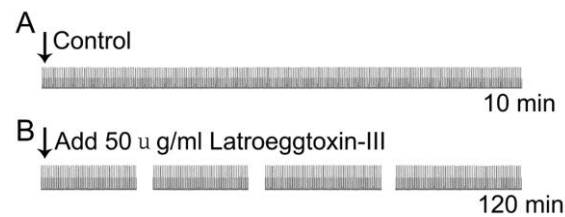

**Figure S2.** Effect of Latroeggtxin-III on the neuromuscular transmission in mouse isolated phrenic nerve-hemidiaphragm preparations. (A) In control experiment with the preparation immersed in Tyrode's solution without adding Latroeggtxin-III, there were no significant changes in the amplitude of diaphragm muscle contraction provoked by applying electrical stimulation at the phrenic nerve within at least 2 h. A shows a representative part of the contraction trace. (B) The contraction trace of diaphragm muscle after Latroeggtxin-III was added into the Tyrode's solution at a final concentration of 50  $\mu\text{g}/\text{mL}$ . The arrows indicated the start points.

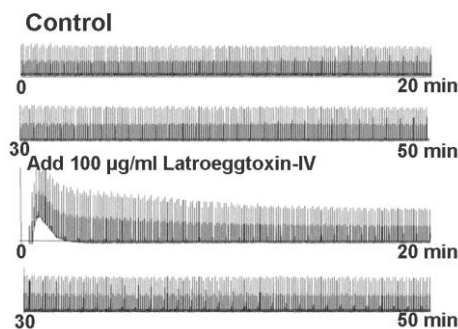

**Figure S3.** Effect of Latroeggtxin-IV on the neuromuscular transmission in mouse isolated phrenic nerve-hemidiaphragm preparations.

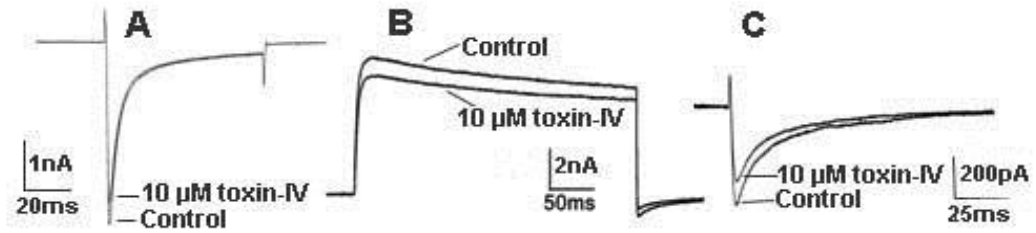

**Figure S4.** Effects of Latroeggtxin-IV on voltage-gated sodium (A); potassium (B) and calcium (C) ion channel currents in rat DRG neurons.

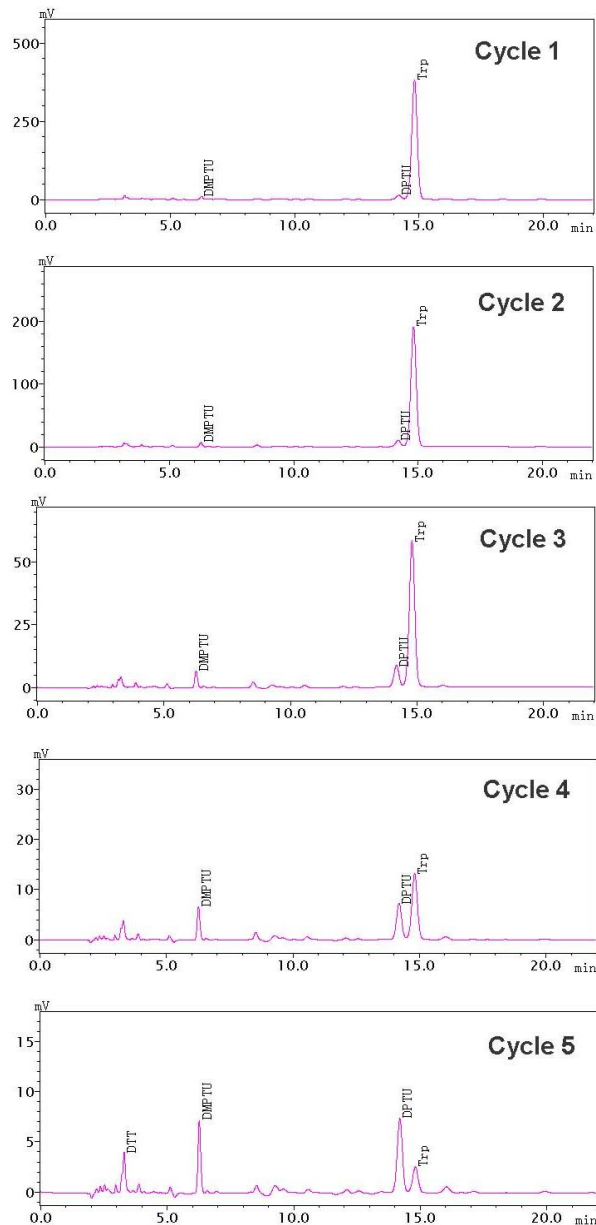

**Figure S5.** Chromatograms of PTH-AAs at cycles 1 to 5 on sequencing of Latroeggtxin-IV.
